# Supplementary material for: Visually guided homing of bumblebees in ambiguous situations: A behavioural and modelling study
Source: PLOS journal article supplement (doi:10.1371/journal.pcbi.1008272), 2020-10-13
Supplement: S5 (10.1371/journal.pcbi.1008272.s005) [file journal.pcbi.1008272.s005]

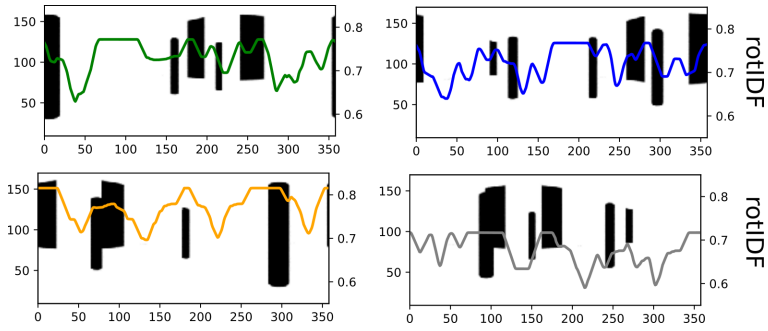

**S5 Fig** The set of views  $S$  for the multi-snapshot brightness model taken at 5cm from nest hole. The 4 views represented as an equirectangular projection constituting the set of view, is overlaid with their own  $rotIDF$  function with the current view as in Fig 2B.
